# Supplementary material
Source: MDPI journal article supplement (https://www.mdpi.com/2305-6320/9/2/9)
Supplement: s1 [file s1]

# Identification of antimycobacterial natural products from a library of marine invertebrate extracts

Kojo Sekyi Acquah<sup>1,2</sup>, Denzil R. Beukes<sup>3,\*</sup>, Ronnett Seldon<sup>4</sup>, Audrey Jordaan<sup>5</sup>, Suthananda. N. Sunassee<sup>1</sup>, Digby F. Warner<sup>5,6</sup> and David W. Gammon<sup>1,\*</sup>

<sup>1</sup> Department of Chemistry, University of Cape Town, Rondebosch 7701, South Africa; ACQKOJ001@myuct.ac.za (K.S.A.); snsunassee@gmail.com (S.N.S.)

<sup>2</sup> Current address (K.S.A.): Division of Medicinal Chemistry, Department of Pharmaceutical Sciences, University of Connecticut, Storrs, CT 06269, USA

<sup>3</sup> School of Pharmacy, University of the Western Cape, Bellville 7535, South Africa

<sup>4</sup> Drug Discovery and Development Centre, Department of Chemistry, University of Cape Town, Cape Town 7700, South Africa; ronnett.seldon@uct.ac.za

<sup>5</sup> SAMRC/NHLS/UCT Molecular Mycobacteriology Research Unit & DST/NRF Centre of Excellence for Biomedical TB Research, Department of Pathology, Faculty of Health Sciences, University of Cape Town, Observatory 7925, South Africa; digby.warner@uct.ac.za (D.F.W); audrey.jordaan@uct.ac.za (A.J)

<sup>6</sup> Institute of Infectious Disease and Molecular Medicine, Faculty of Health Sciences, University of Cape Town, Observatory 7925, South Africa

<sup>7</sup> Wellcome Centre for Infectious Diseases Research in Africa, University of Cape Town, Rondebosch 7701, South Africa

## List of Figures

|                                                                                                                                                                                                         |    |
|---------------------------------------------------------------------------------------------------------------------------------------------------------------------------------------------------------|----|
| Figure S1. HR-ESI-MS spectrum of heteronemin <b>1</b> .....                                                                                                                                             | 3  |
| Figure S2. <sup>1</sup> H-NMR spectrum (600MHz, CDCl <sub>3</sub> , 303K) of heteronemin <b>1</b> .....                                                                                                 | 4  |
| Figure S3. <sup>13</sup> C-NMR spectrum (150MHz, CDCl <sub>3</sub> , 303K) of heteronemin <b>1</b> .....                                                                                                | 5  |
| Figure S4. HSQC NMR spectrum (600MHz, CDCl <sub>3</sub> , 303K) of heteronemin <b>1</b> .....                                                                                                           | 6  |
| Figure S5. <sup>1</sup> H- <sup>1</sup> H COSY spectrum (600MHz, CDCl <sub>3</sub> , 303K) of heteronemin <b>1</b> .....                                                                                | 7  |
| Figure S6. HMBC NMR spectrum (600MHz, CDCl <sub>3</sub> , 303K) of heteronemin <b>1</b> .....                                                                                                           | 8  |
| Figure S7. HR-ESI-MS spectrum of bengamide P <b>2</b> .....                                                                                                                                             | 9  |
| Figure S8. <sup>1</sup> H-NMR spectrum (600MHz, CDCl <sub>3</sub> , 303K) of bengamide P <b>2</b> .....                                                                                                 | 10 |
| Figure S9. <sup>13</sup> C-NMR spectrum (150MHz, CDCl <sub>3</sub> , 303K) of bengamide P <b>2</b> .....                                                                                                | 11 |
| Figure S10. <sup>1</sup> H- <sup>1</sup> H COSY spectrum (600MHz, CDCl <sub>3</sub> , 303K) of bengamide P <b>2</b> .....                                                                               | 12 |
| Figure S11. HSQC NMR spectrum (600MHz, CDCl <sub>3</sub> , 303K) of bengamide P <b>2</b> .....                                                                                                          | 13 |
| Figure S12. HMBC NMR spectrum (600MHz, CDCl <sub>3</sub> , 303K) of bengamide P <b>2</b> .....                                                                                                          | 14 |
| Figure S13. HR-ESI-MS spectrum of bengamide Q <b>3</b> .....                                                                                                                                            | 15 |
| Figure S14. <sup>1</sup> H-NMR spectrum (600MHz, CDCl <sub>3</sub> , 303K) of bengamide Q <b>3</b> .....                                                                                                | 16 |
| Figure S15. <sup>13</sup> C-NMR spectrum (150MHz, CDCl <sub>3</sub> , 303K) of bengamide Q <b>3</b> .....                                                                                               | 17 |
| Figure S16. HSQC NMR spectrum (600MHz, CDCl <sub>3</sub> , 303K) bengamide Q <b>3</b> .....                                                                                                             | 18 |
| Figure S17. <sup>1</sup> H- <sup>1</sup> H COSY spectrum (600MHz, CDCl <sub>3</sub> , 303K) of bengamide Q <b>3</b> .....                                                                               | 19 |
| Figure S18. <sup>1</sup> H- <sup>1</sup> H TOCSY spectrum (600MHz, CDCl <sub>3</sub> , 303K) of bengamide Q <b>3</b> .....                                                                              | 20 |
| Figure S19. HMBC NMR spectrum (600MHz, CDCl <sub>3</sub> , 303K) of bengamide Q <b>3</b> .....                                                                                                          | 21 |
| Figure S20. <sup>1</sup> H-NMR spectrum (600MHz, CDCl <sub>3</sub> , 303K) of F107 .....                                                                                                                | 22 |
| Figure S21. <sup>1</sup> H-NMR spectrum (600MHz, CDCl <sub>3</sub> , 303K) of F114 .....                                                                                                                | 23 |
| Figure S22. <sup>1</sup> H-NMR spectrum (600MHz, CDCl <sub>3</sub> , 303K) of F130 .....                                                                                                                | 24 |
| Figure S23. MS/MS fragmentation pattern of bengamide R <b>4</b> (A) and bengamide S <b>5</b> (B) with fragment ions circled in red showing methylation is on the nitrogen of the caprolactam ring. .... | 25 |

## List of Table

|                                                                                                                                                                                                                                                                         |    |
|-------------------------------------------------------------------------------------------------------------------------------------------------------------------------------------------------------------------------------------------------------------------------|----|
| Table S1. <sup>13</sup> C and <sup>1</sup> H chemical shifts of Heteronemin <b>1</b> isolated and that reported in literature. ....                                                                                                                                     | 26 |
| Table S2. <sup>13</sup> C and <sup>1</sup> H chemical shifts of bengamide P <b>2</b> isolated and that reported in literature. ....                                                                                                                                     | 27 |
| Table S3. <sup>13</sup> C and <sup>1</sup> H chemical shifts of bengamide Q <b>3</b> isolated and that reported in literature. ....                                                                                                                                     | 28 |
| Table S4. Compounds isolated and tentatively identified in the molecular cluster of the crude extract (SS2) of the sponge <i>Jaspis splendens</i> with their corresponding masses (observed and calculated), molecular formulae (MF), and mass error (ID (Δ ppm)) ..... | 29 |

ksa6 #1684 RT: 23.57 AV: 1 NL: 2.04E7  
F: FTMS + p ESI Full ms [150.00-2000.00]

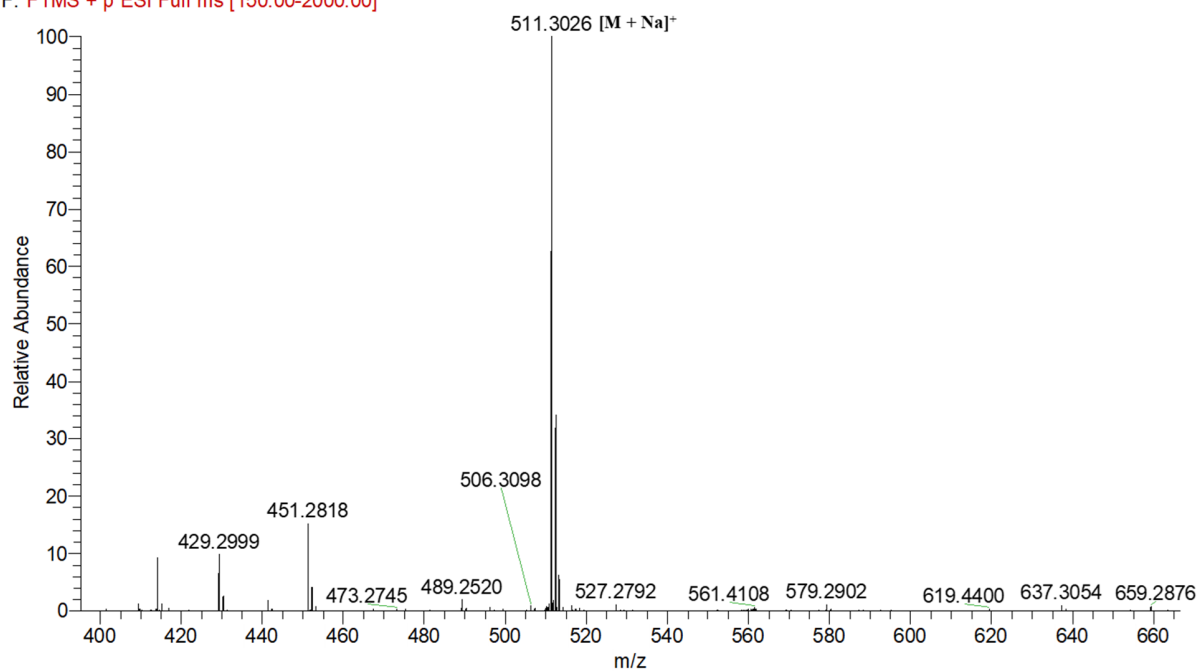

Figure S1. HR-ESI-MS spectrum of heteronemin 1

SS10A\_1, 1H, 303K, cdcl3

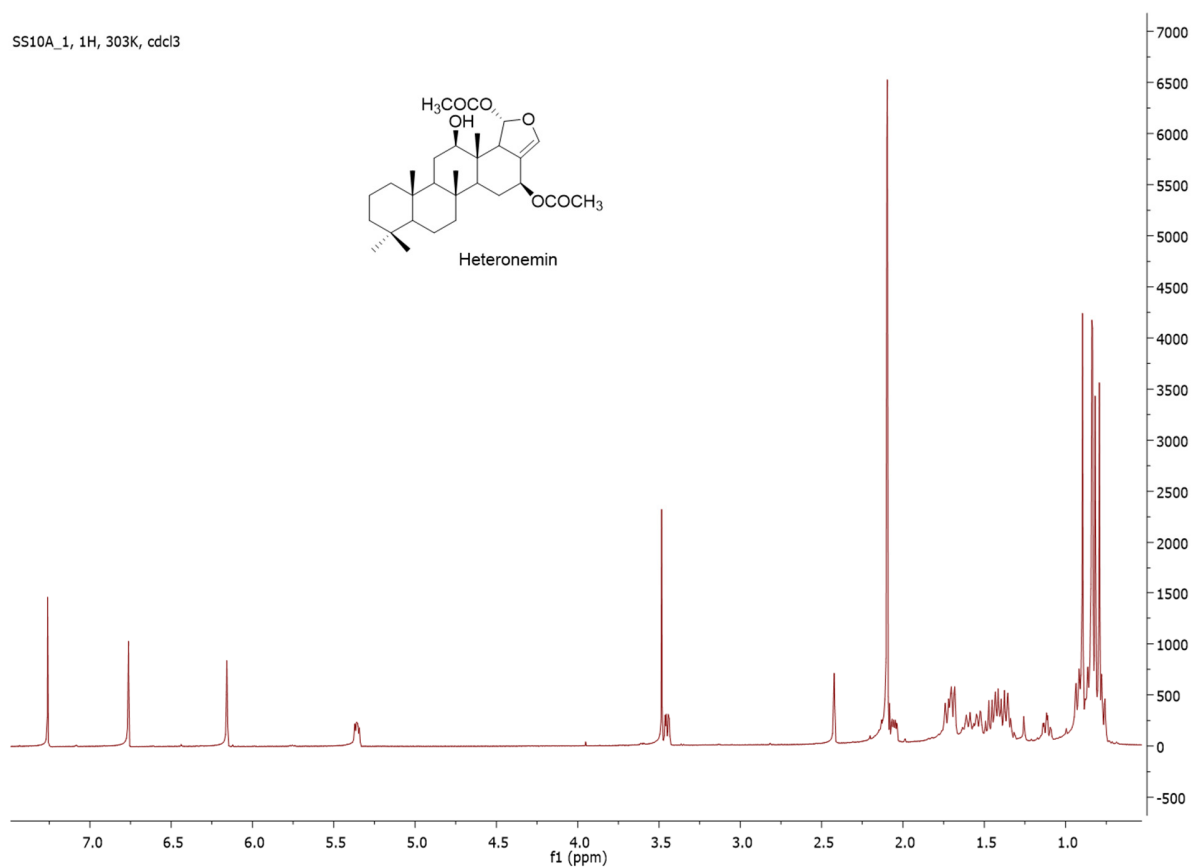

Figure S2. <sup>1</sup>H-NMR spectrum (600MHz, CDCl<sub>3</sub>, 303K) of heteronemin 1

SS10A\_1, 13C, 303K, cdcl3

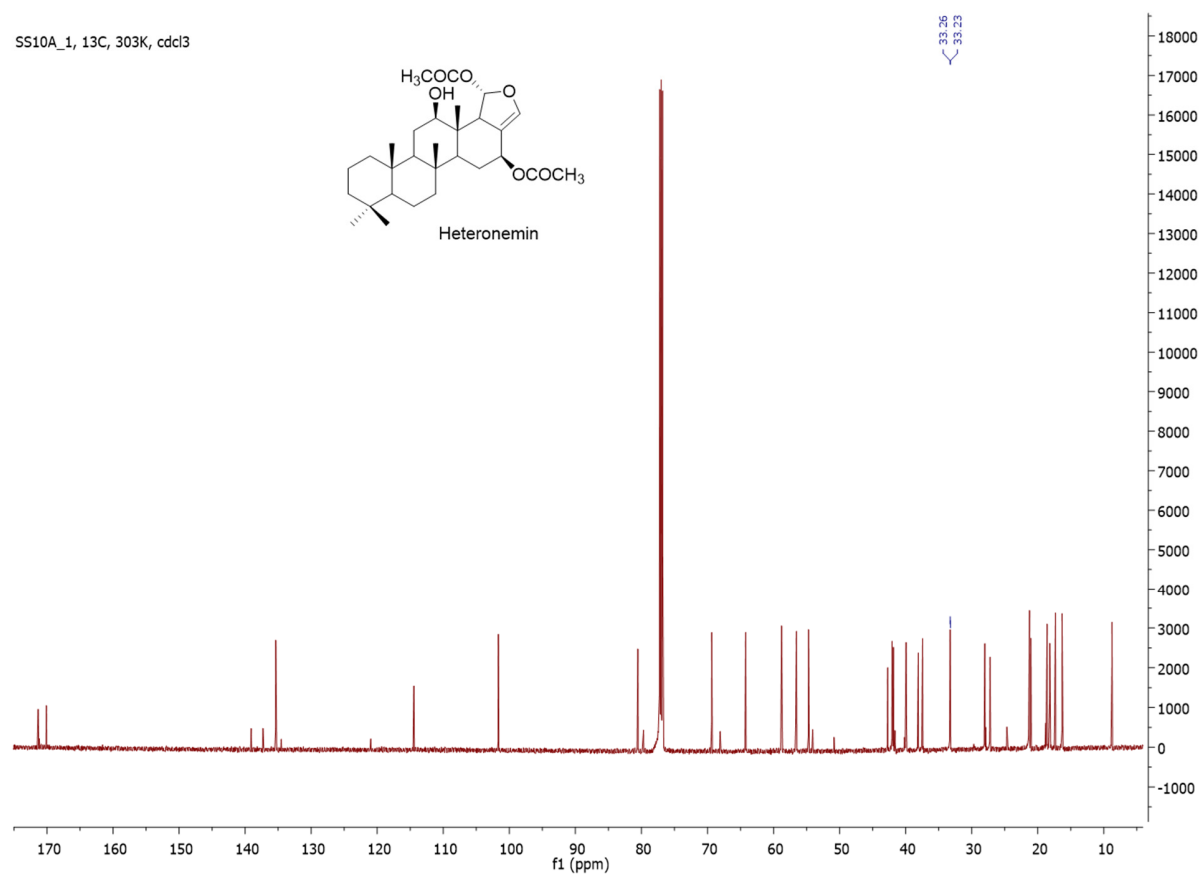

Figure S3. <sup>13</sup>C-NMR spectrum (150MHz, CDCl<sub>3</sub>, 303K) of heteronemin 1

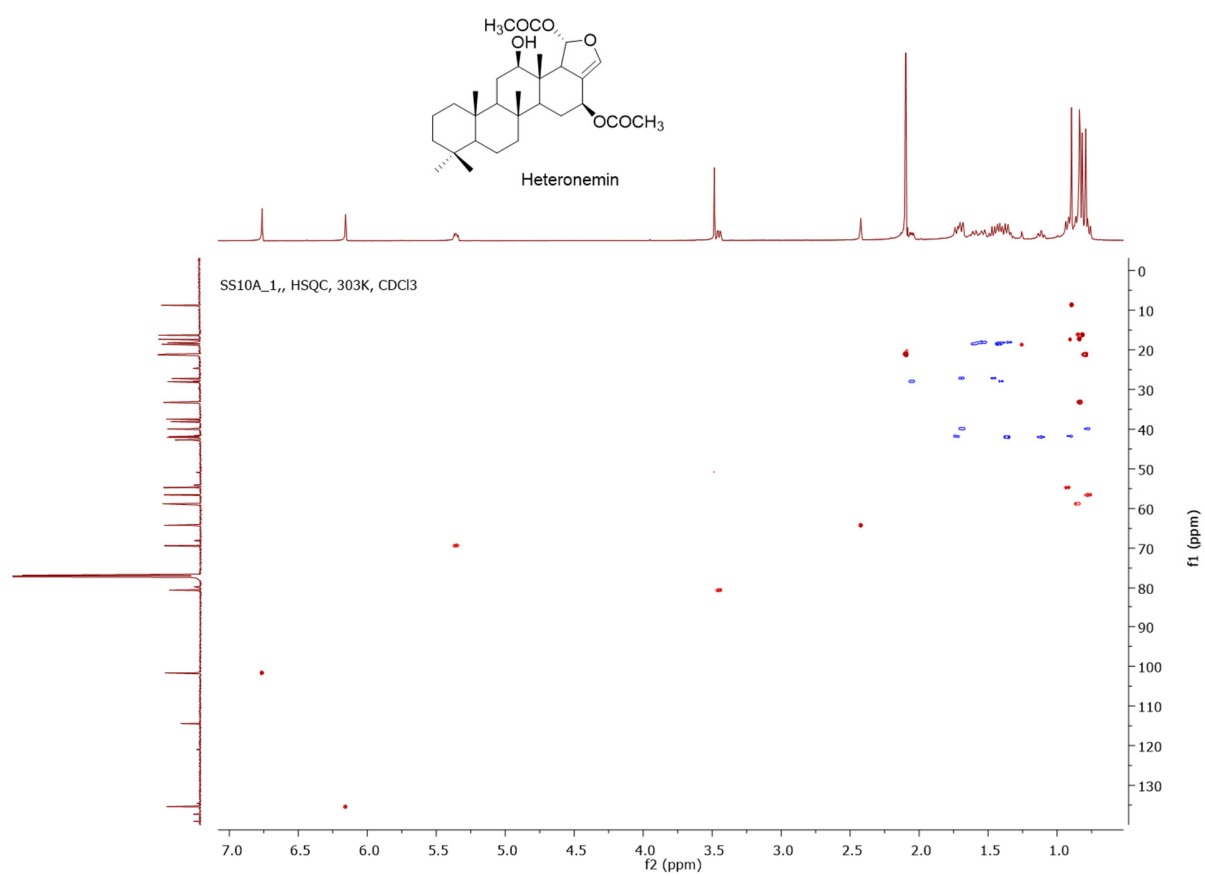

Figure S4. HSQC NMR spectrum (600MHz,  $\text{CDCl}_3$ , 303K) of heteronemin 1

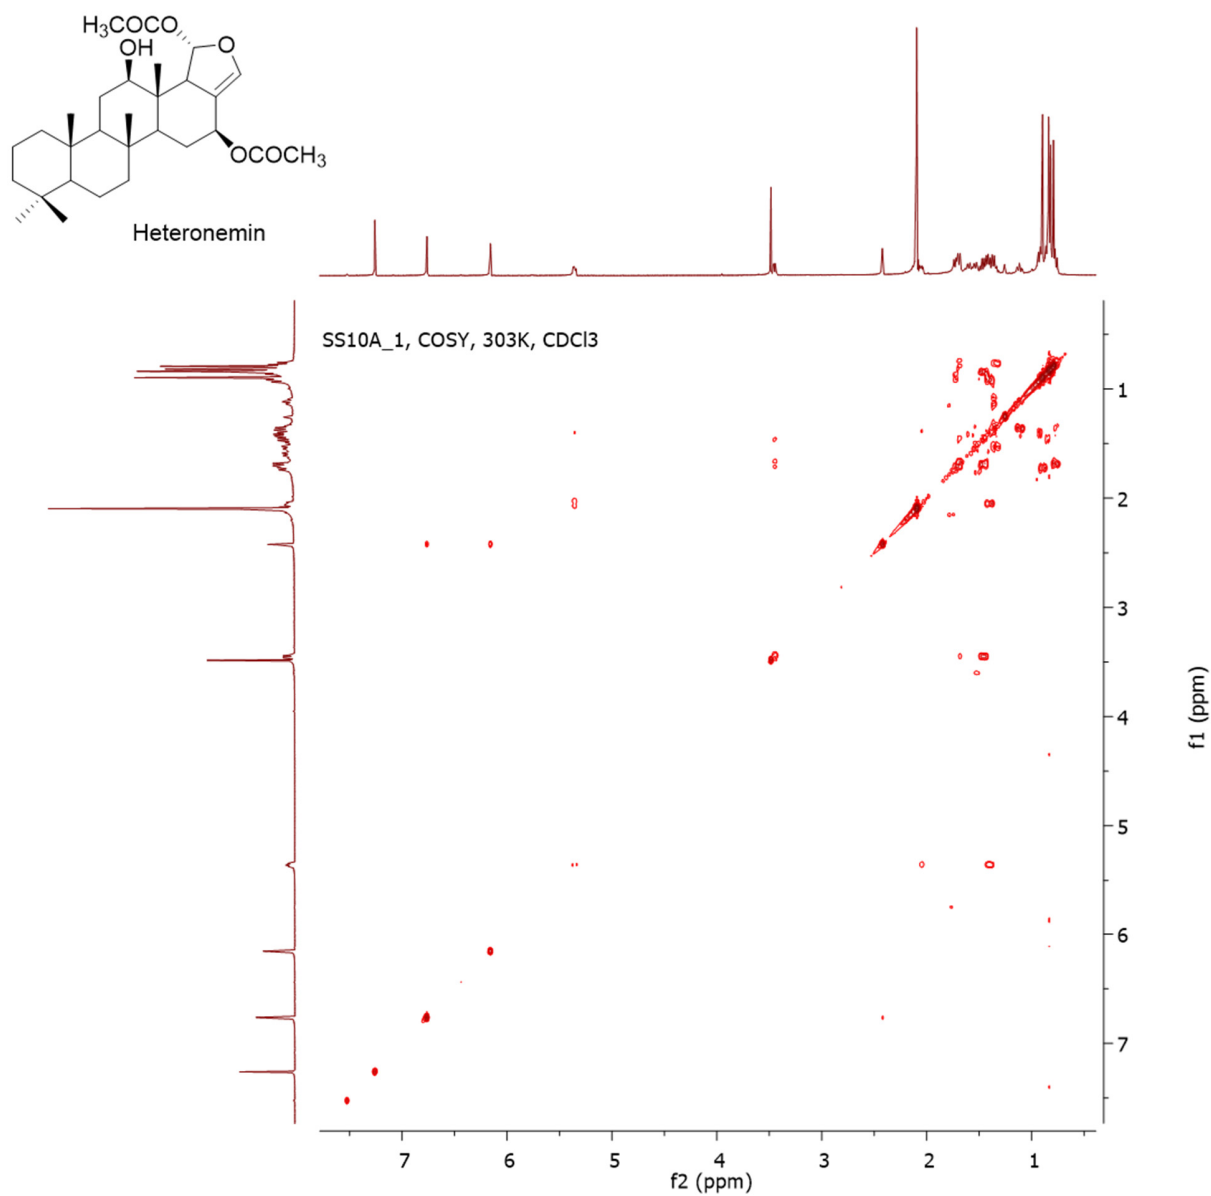

Figure S5. <sup>1</sup>H-<sup>1</sup>H COSY spectrum (600MHz, CDCl<sub>3</sub>, 303K) of heteronemin **1**

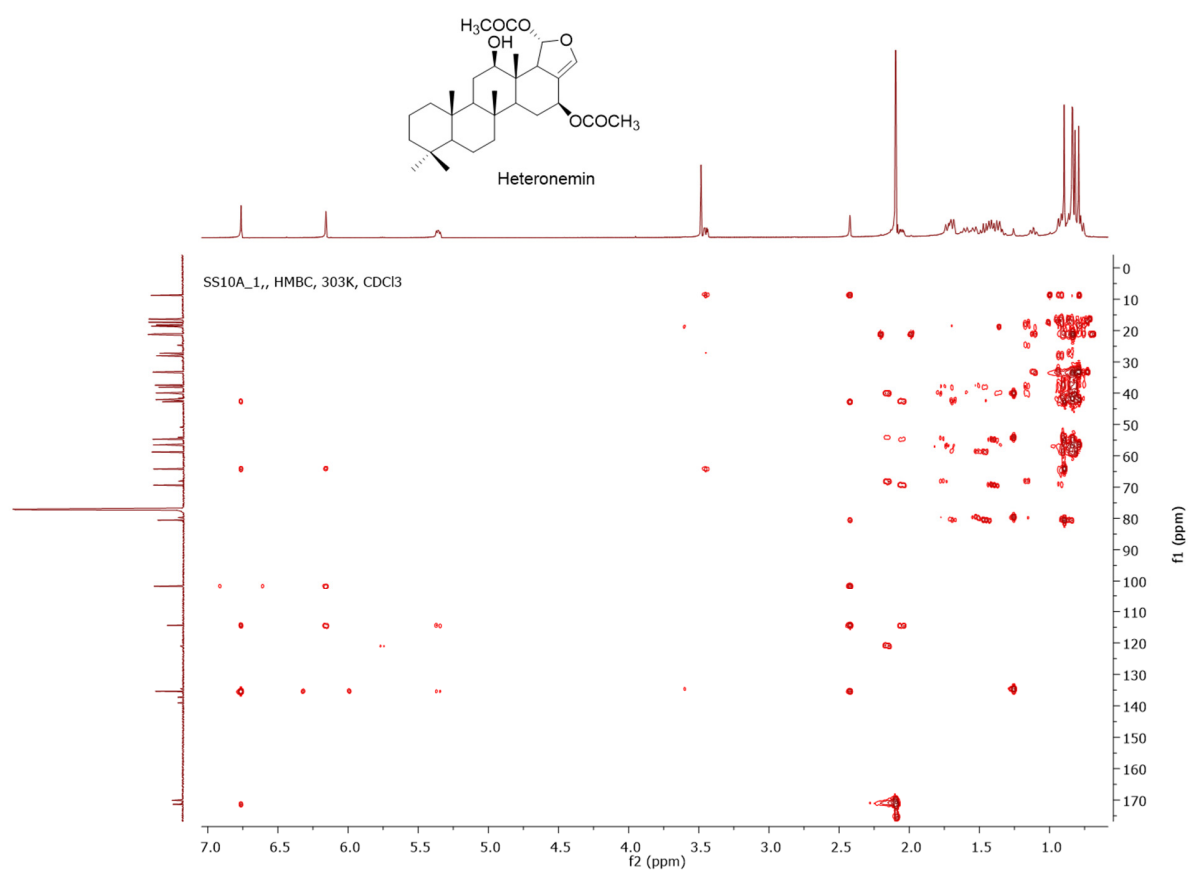

Figure S6. HMBC NMR spectrum (600MHz, CDCl<sub>3</sub>, 303K) of heteronemin 1



ksa7 #1693 RT: 23.74 AV: 1 NL: 2.24E6  
F: FTMS + p ESI Full ms [150.00-2000.00]

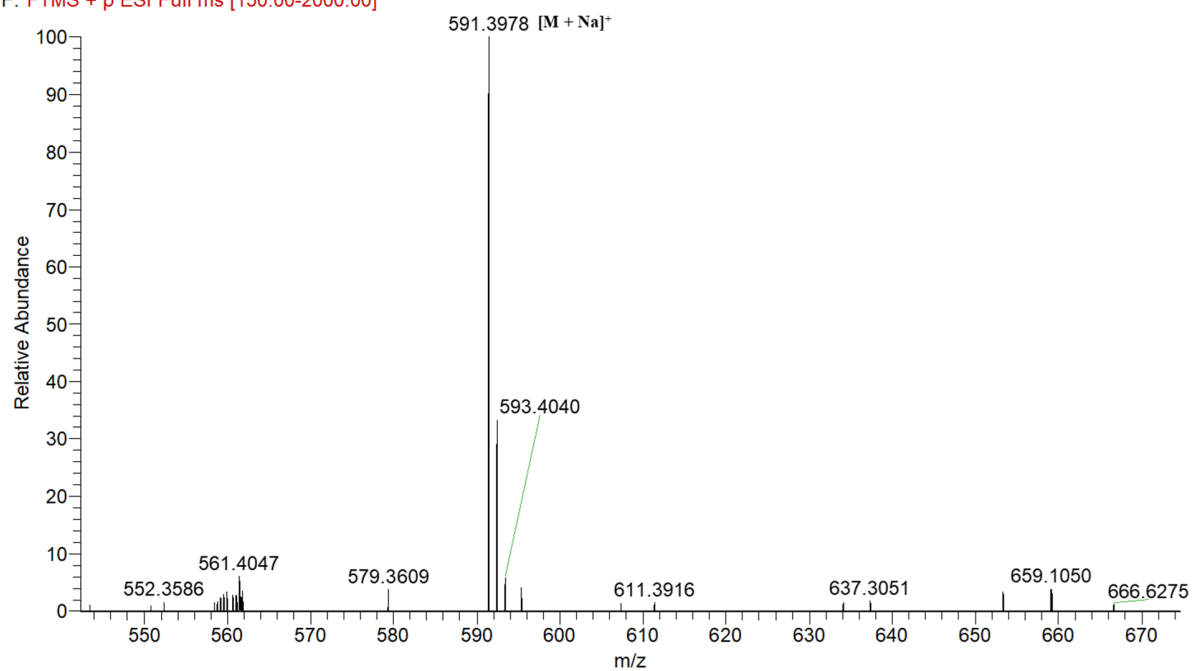

Figure S7. HR-ESI-MS spectrum of bengamide P 2

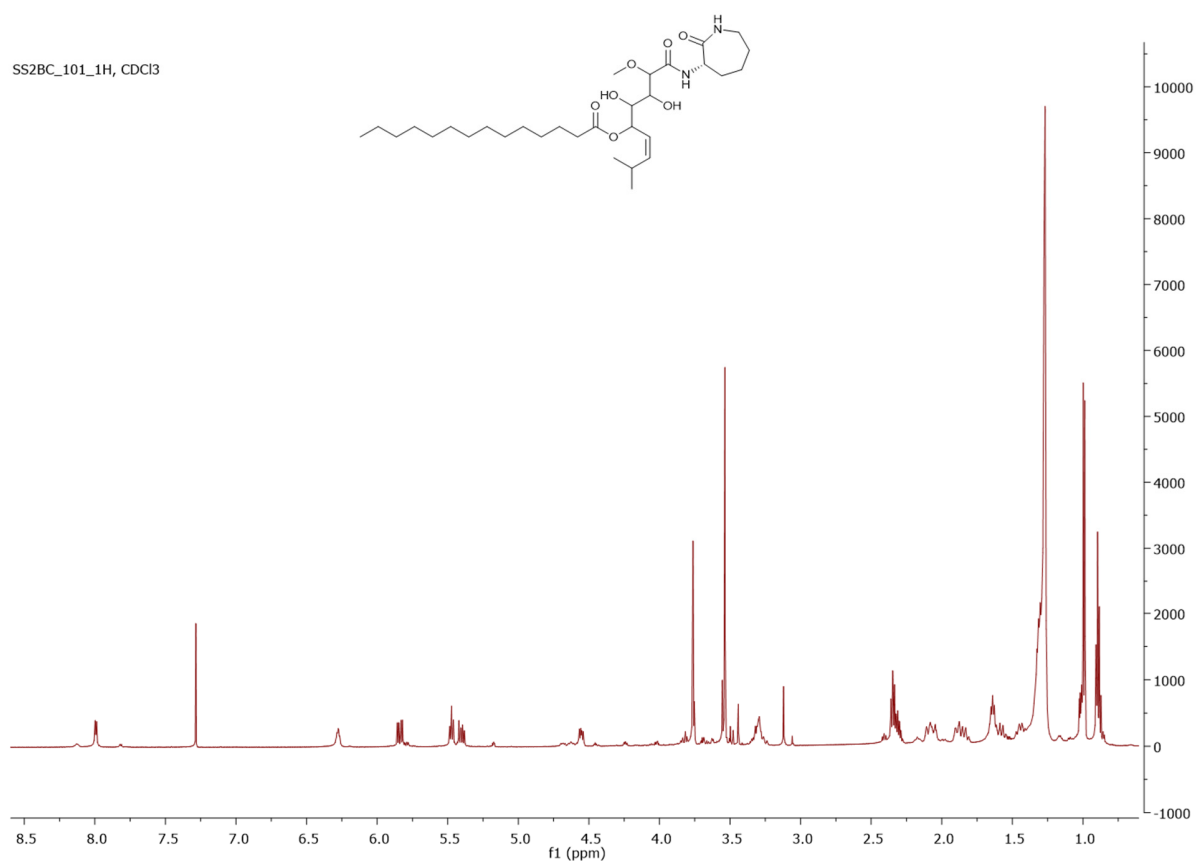

Figure S8. <sup>1</sup>H-NMR spectrum (600MHz, CDCl<sub>3</sub>, 303K) of bengamide P 2

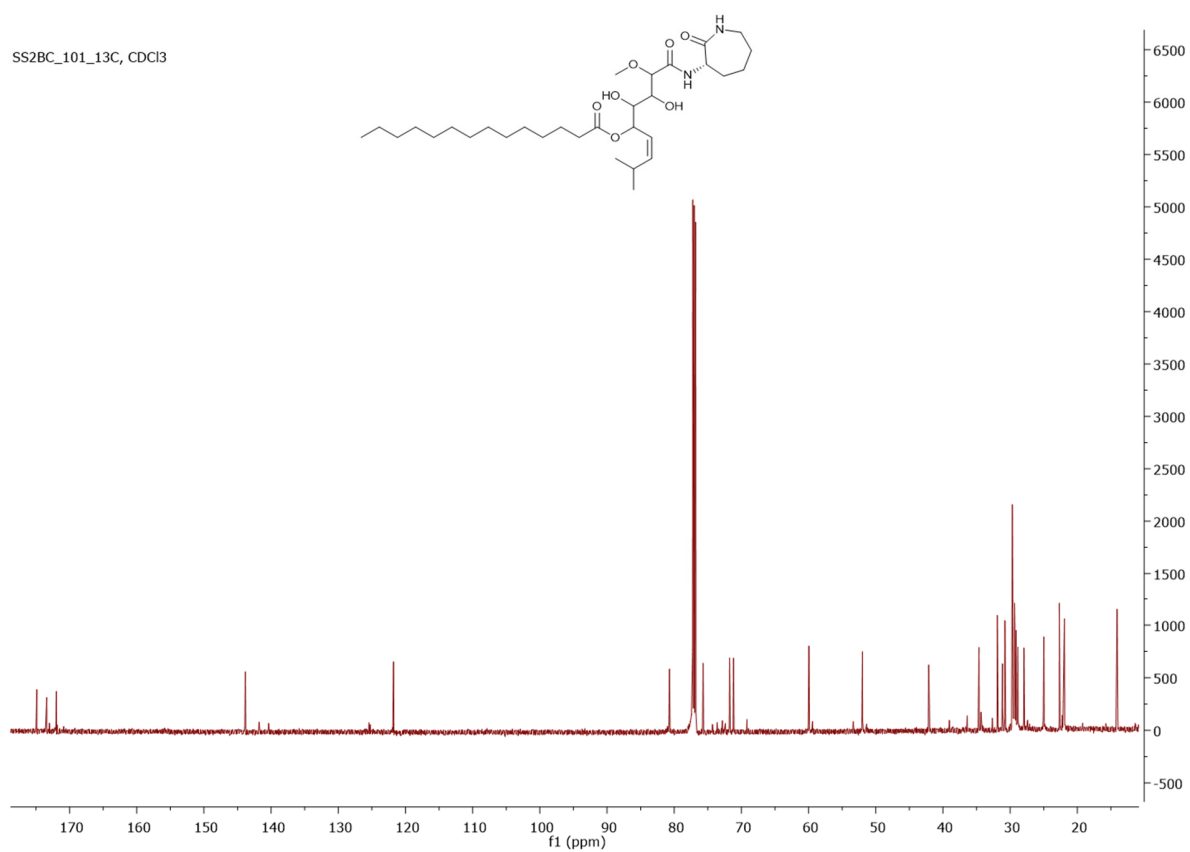

Figure S9. <sup>13</sup>C-NMR spectrum (150MHz, CDCl<sub>3</sub>, 303K) of bengamide P 2

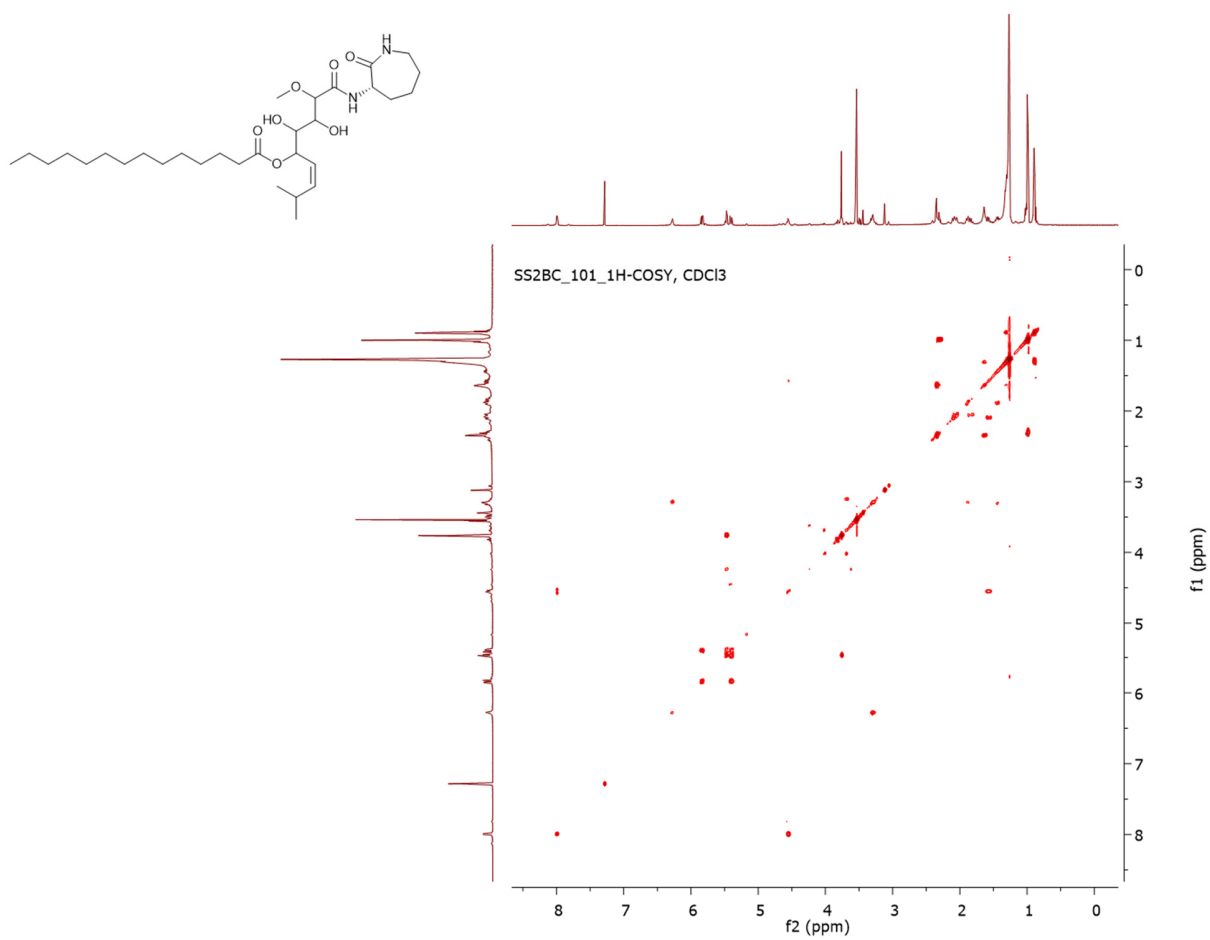

Figure S10.  $^1\text{H}$ - $^1\text{H}$  COSY spectrum (600MHz,  $\text{CDCl}_3$ , 303K) of bengamide P 2

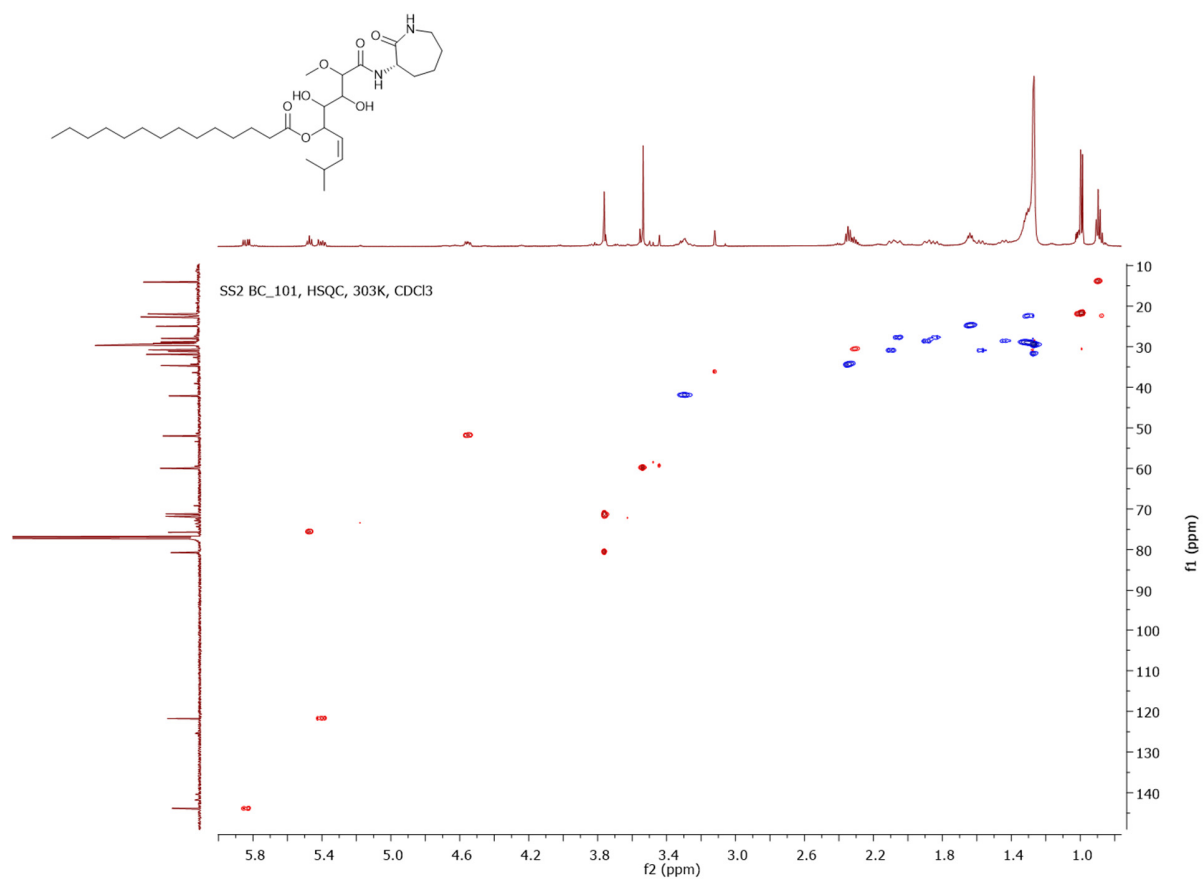

Figure S11. HSQC NMR spectrum (600MHz, CDCl<sub>3</sub>, 303K) of bengamide P 2

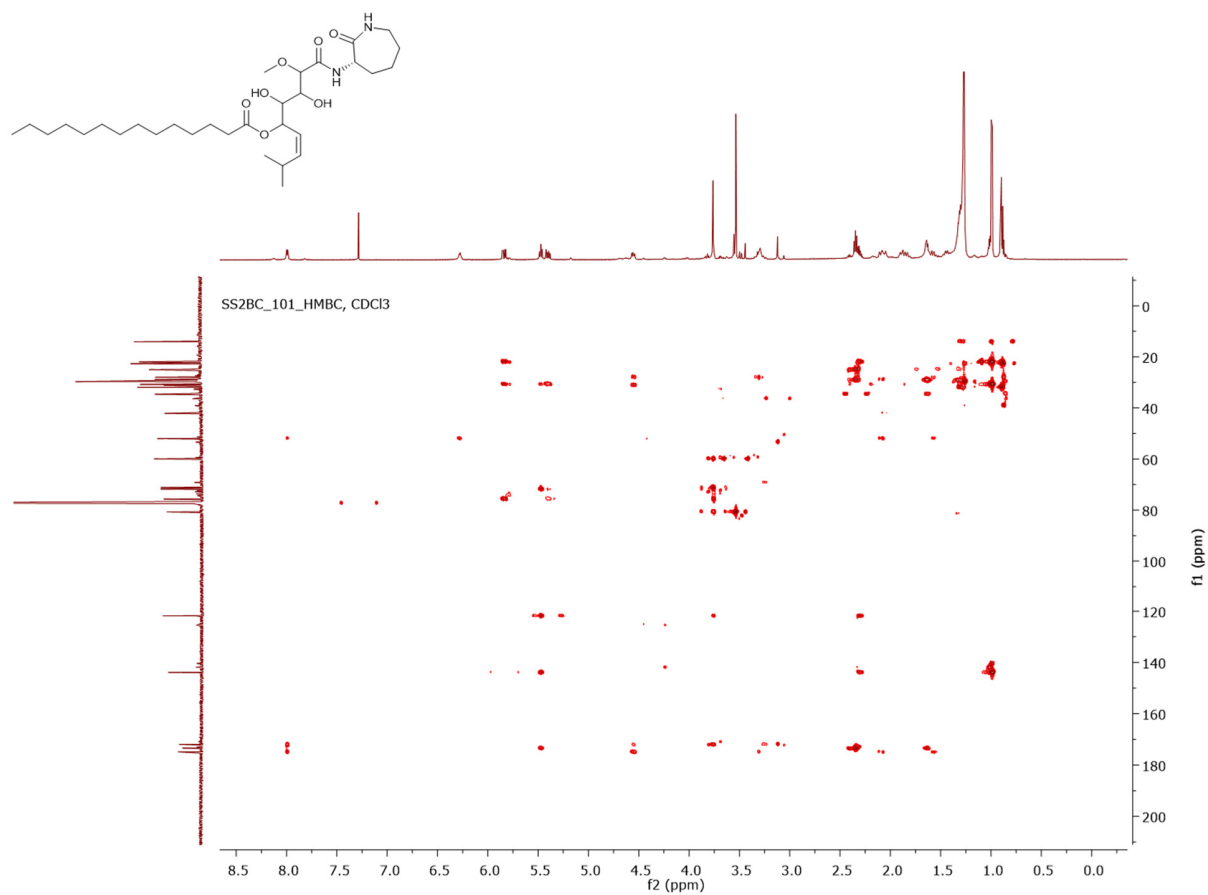

Figure S12. HMBC NMR spectrum (600MHz, CDCl<sub>3</sub>, 303K) of bengamide P 2

ksa7 #1726 RT: 24.17 AV: 1 NL: 2.79E6  
F: FTMS + p ESI Full ms [150.00-2000.00]

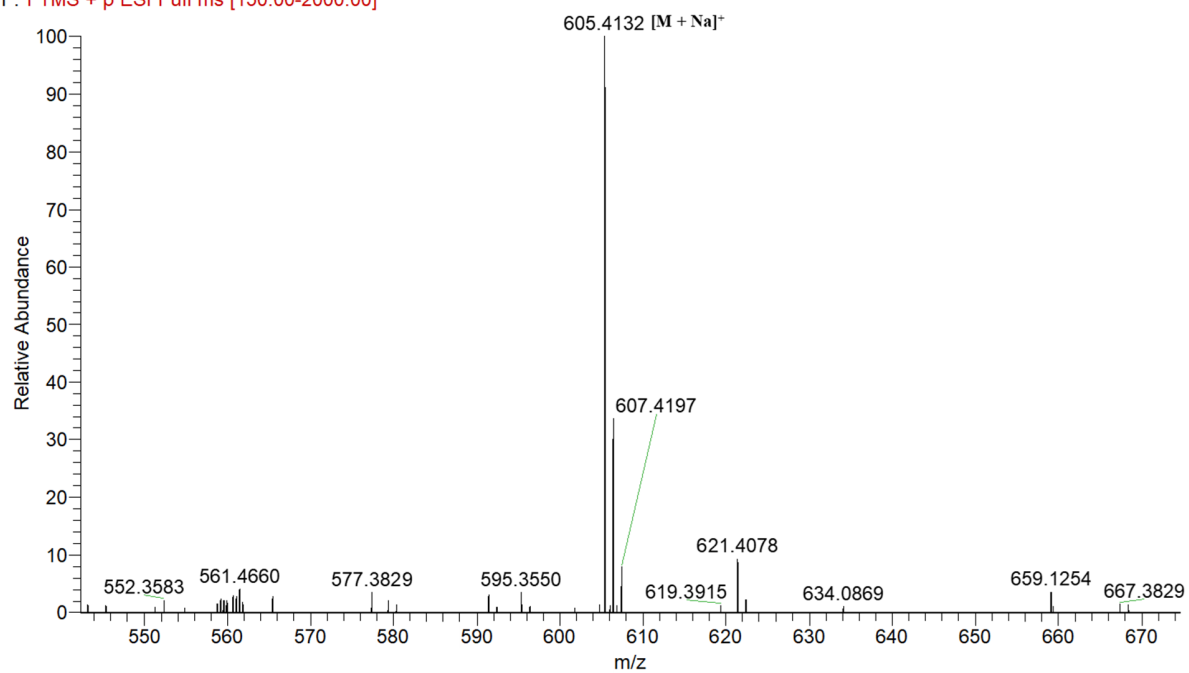

Figure S13. HR-ESI-MS spectrum of bengamide Q 3

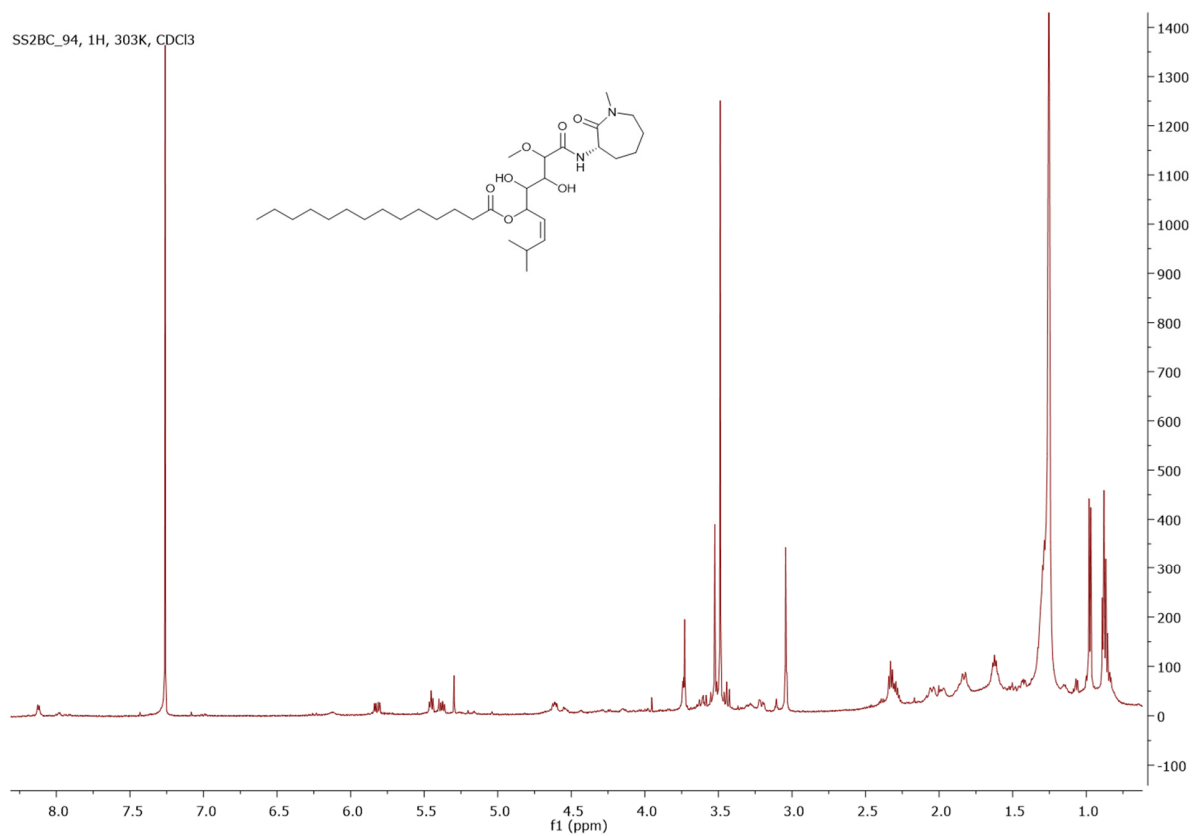

Figure S14. <sup>1</sup>H-NMR spectrum (600MHz, CDCl<sub>3</sub>, 303K) of bengamide Q 3



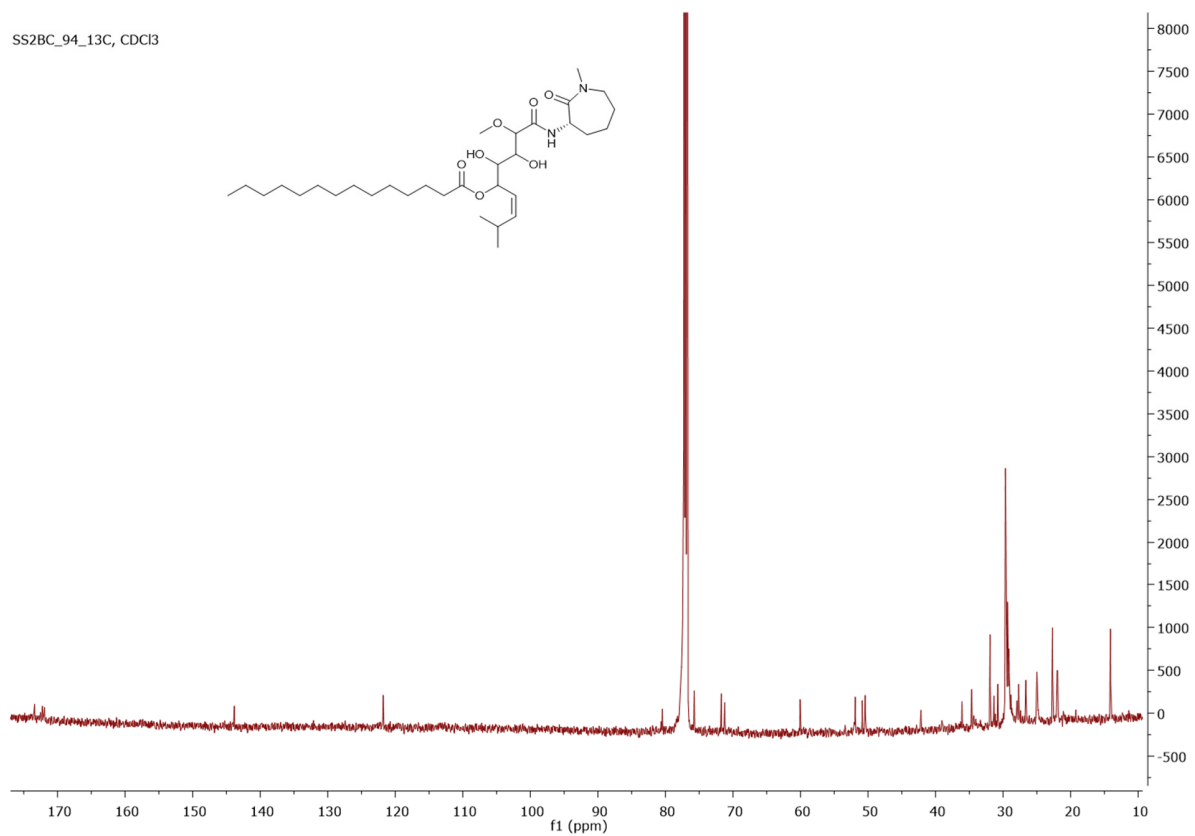

Figure S15. <sup>13</sup>C-NMR spectrum (150MHz, CDCl<sub>3</sub>, 303K) of bengamide Q 3

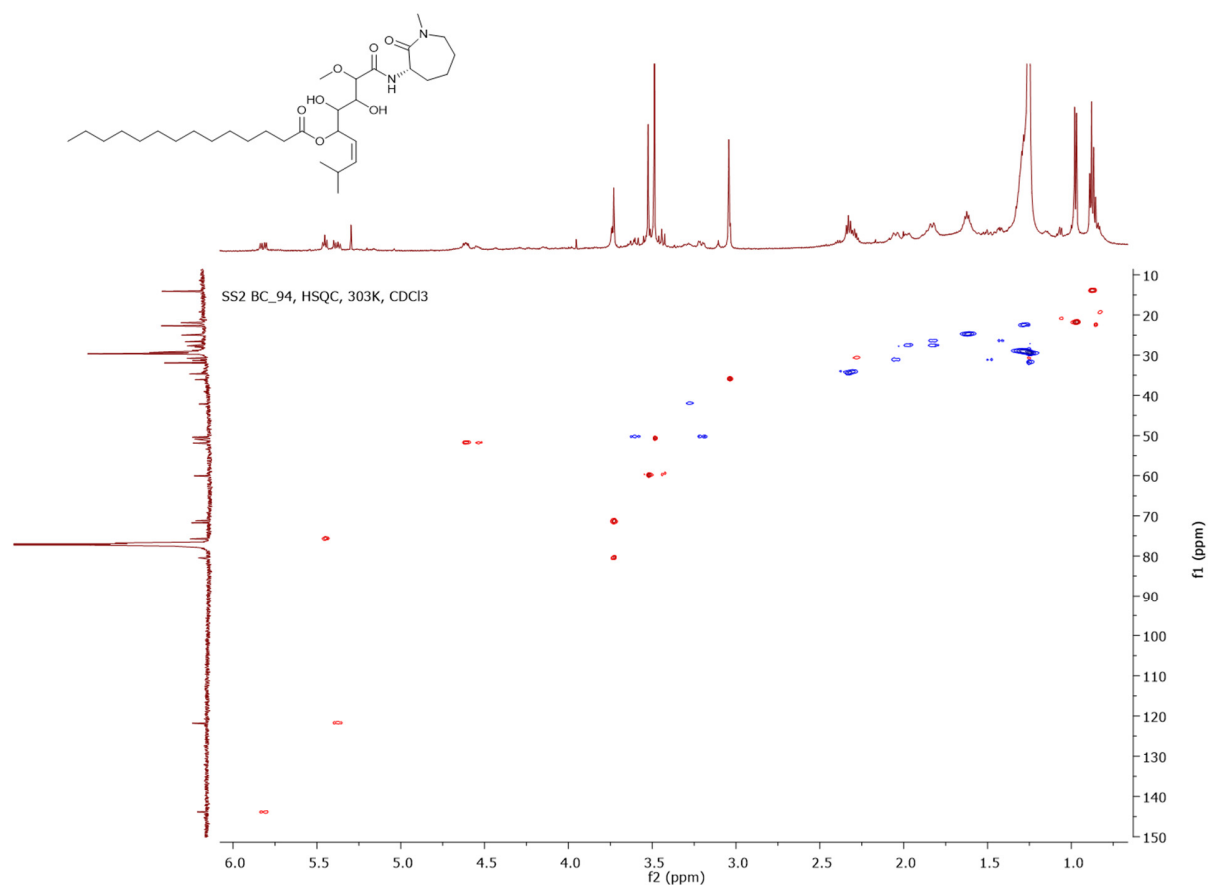

Figure S16. HSQC NMR spectrum (600MHz, CDCl<sub>3</sub>, 303K) bengamide Q **3**

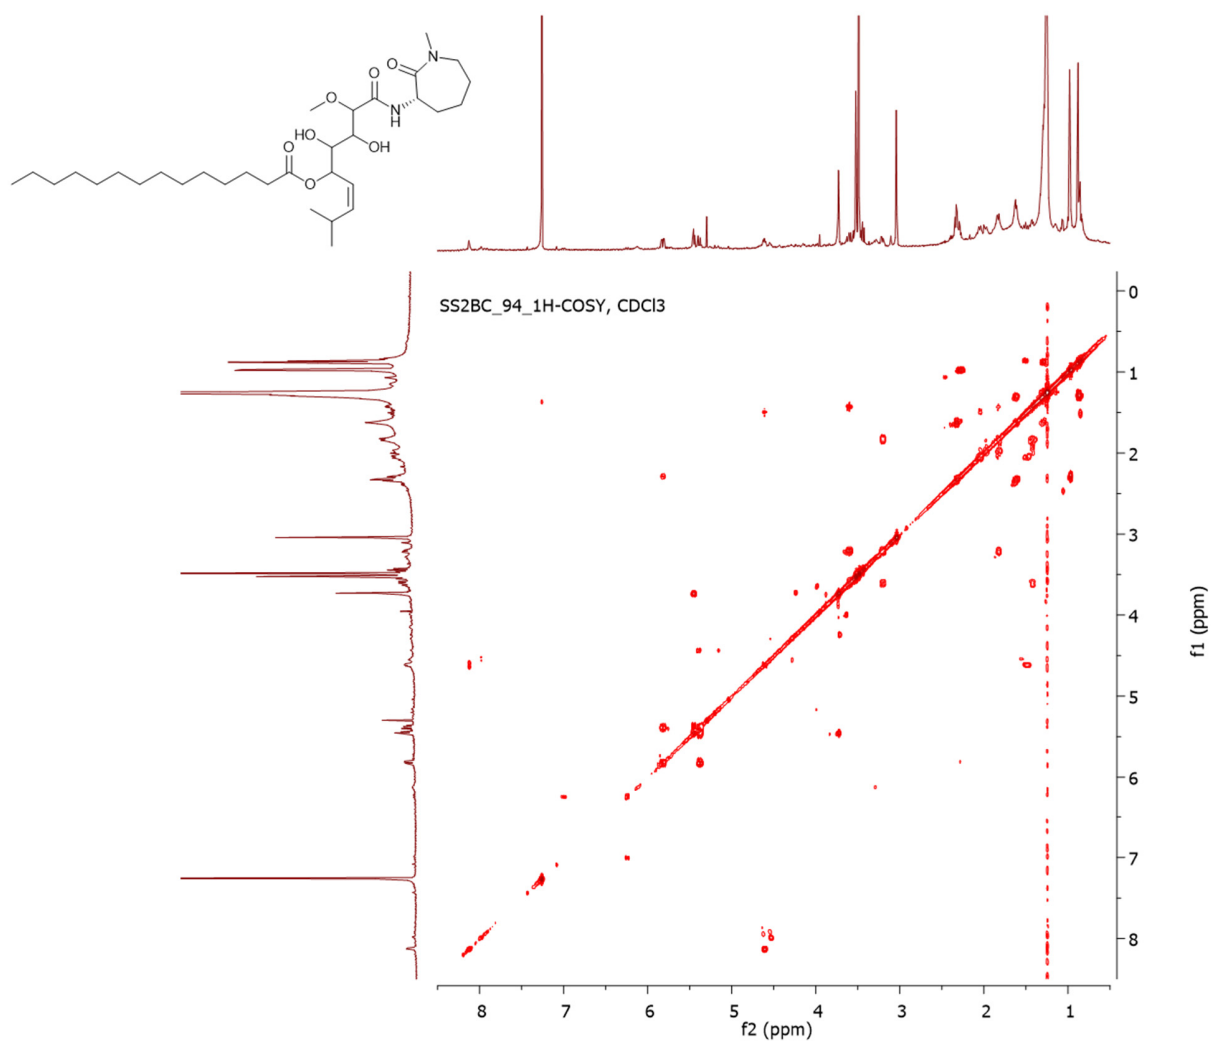

Figure S17. <sup>1</sup>H-<sup>1</sup>H COSY spectrum (600MHz, CDCl<sub>3</sub>, 303K) of bengamide Q 3

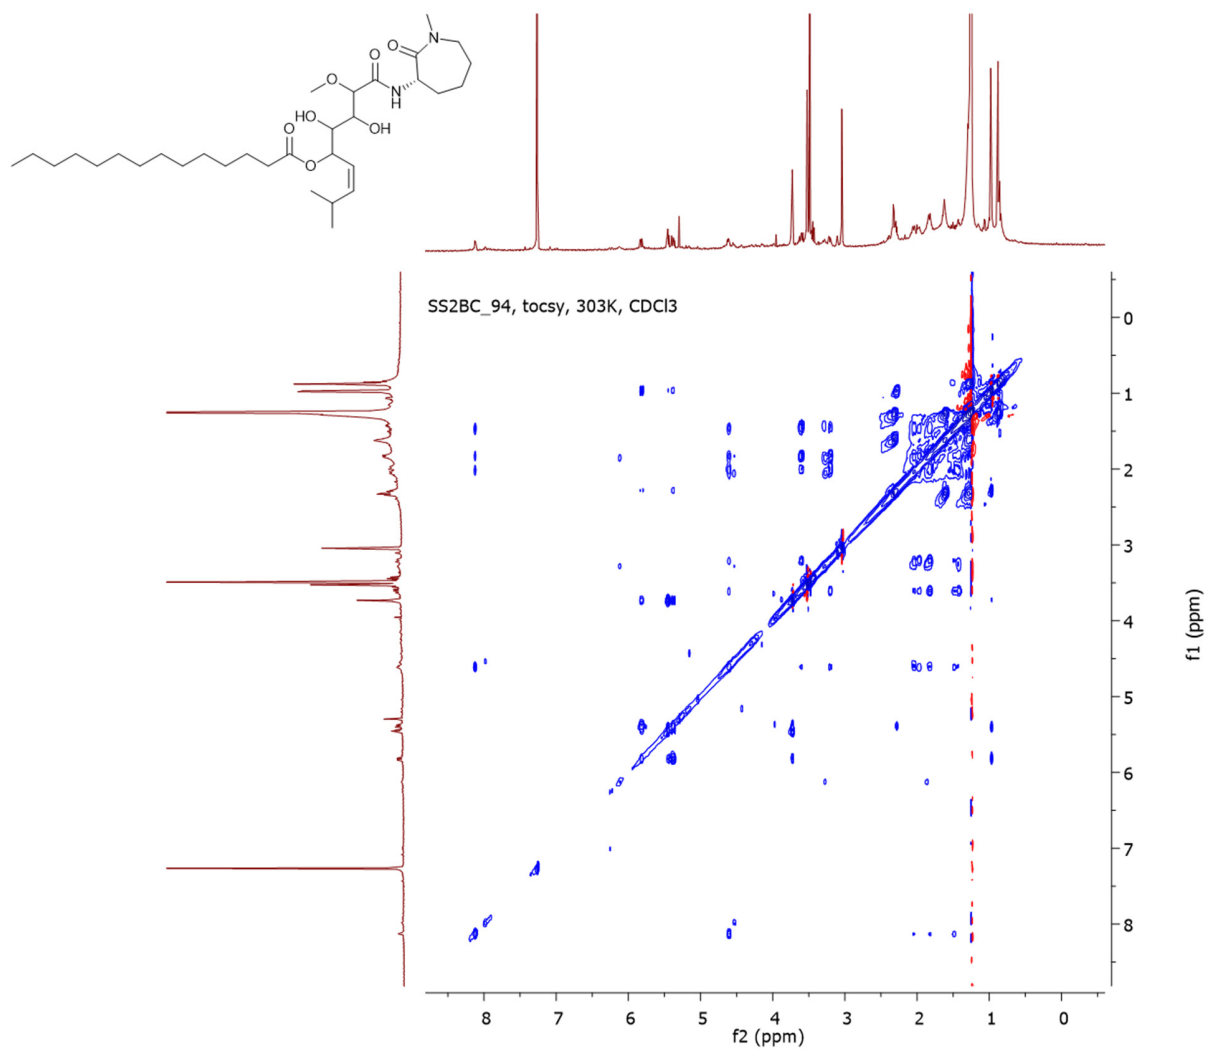

Figure S18.  $^1\text{H}$ - $^1\text{H}$  TOCSY spectrum (600MHz,  $\text{CDCl}_3$ , 303K) of bengamide Q 3

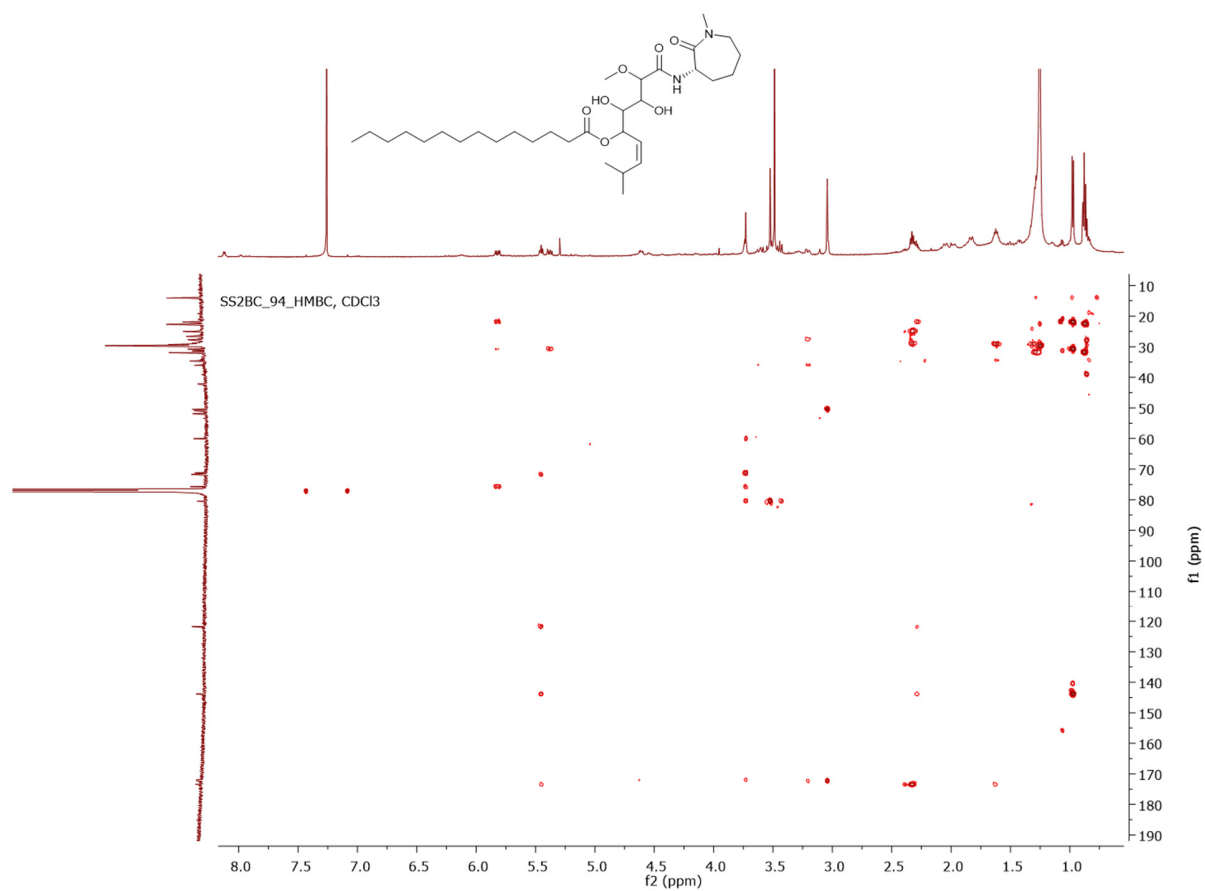

Figure S19. HMBC NMR spectrum (600MHz, CDCl<sub>3</sub>, 303K) of bengamide Q 3

SS2B&C\_107, 1H, 303K, CDCl3

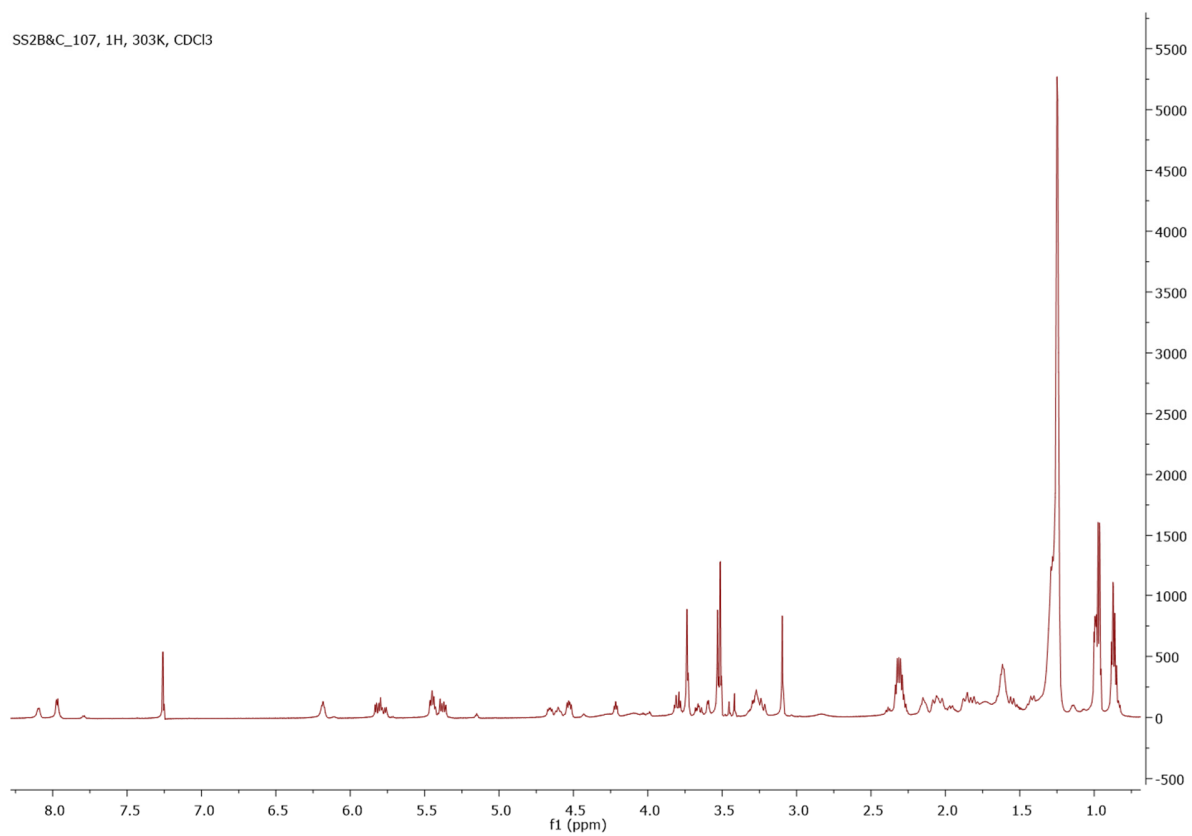

Figure S20.  $^1\text{H}$ -NMR spectrum (600MHz,  $\text{CDCl}_3$ , 303K) of F107

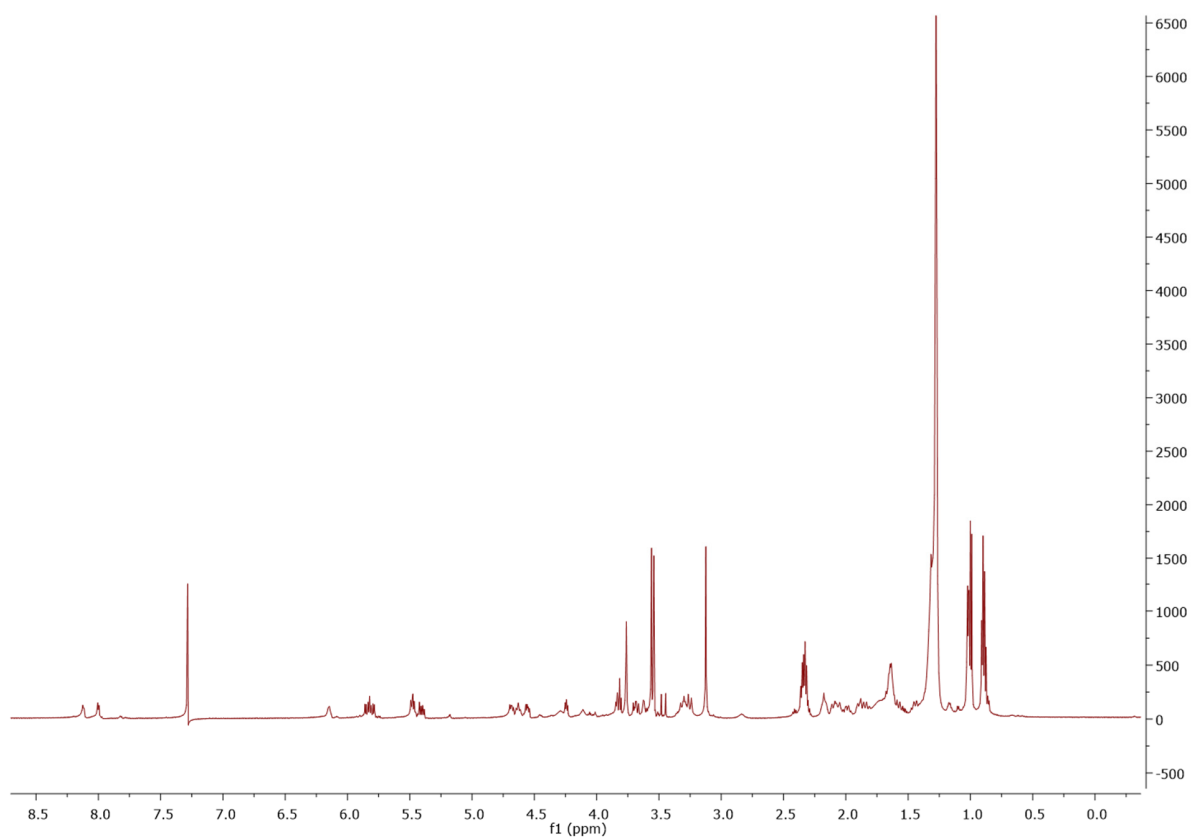

Figure S21.  $^1\text{H}$ -NMR spectrum (600MHz,  $\text{CDCl}_3$ , 303K) of F114

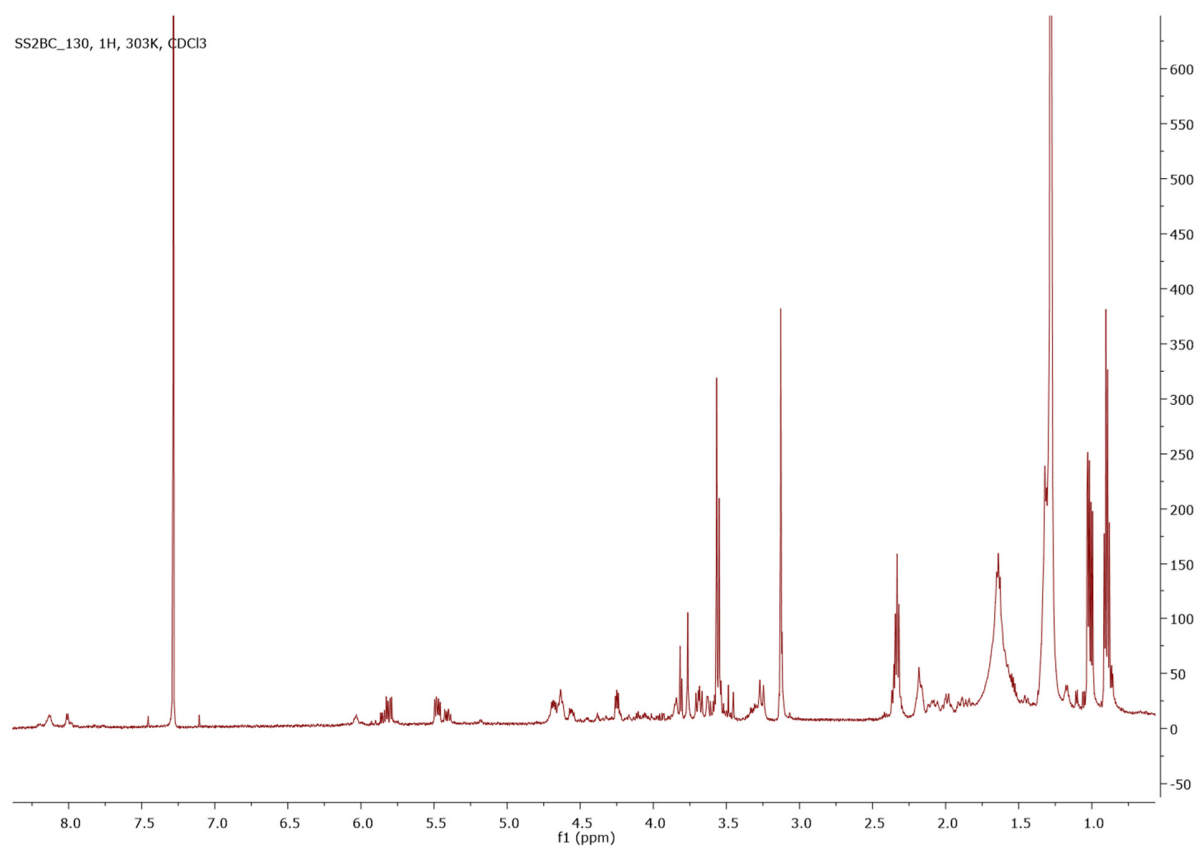

Figure S22. <sup>1</sup>H-NMR spectrum (600MHz, CDCl<sub>3</sub>, 303K) of F130



ksa21 #1757-1760 RT: 24.59-24.63 AV: 2 NL: 1.67E5  
T: Average spectrum MS2 619.43 (1757-1760)

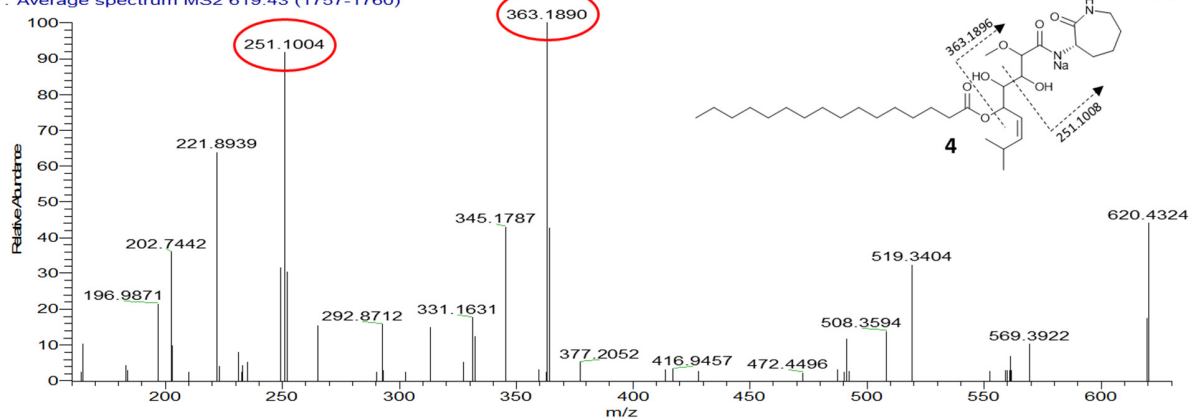

ksa21 #1814-1817 RT: 25.37-25.41 AV: 2 NL: 4.49E5  
T: Average spectrum MS2 633.44 (1814-1817)

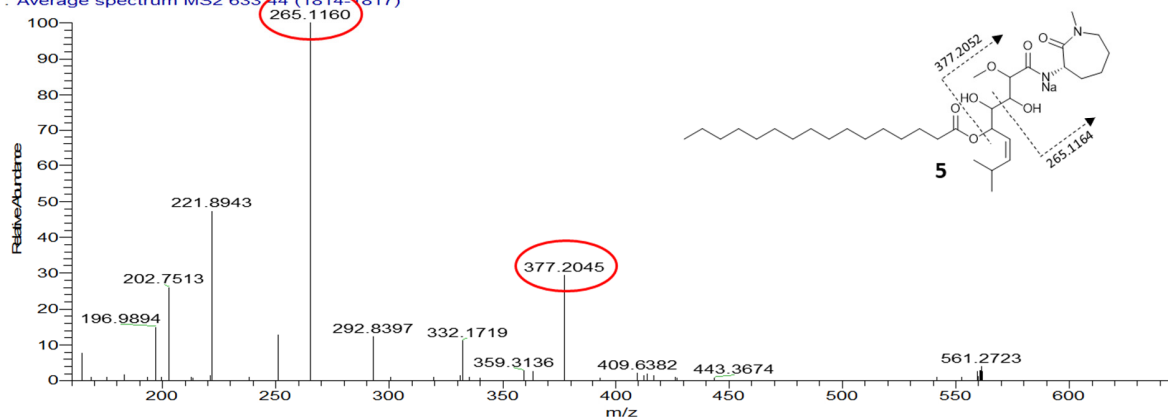

Figure S23. MS/MS fragmentation pattern of bengamide R 4 (A) and bengamide S 5 (B) with fragment ions circled in red showing methylation is on the nitrogen of the caprolactam ring.

Table S1. <sup>13</sup>C and <sup>1</sup>H chemical shifts of Heteronemin 1 isolated and that reported in literature.

| Position | Isolated        |                                      | Literature <sup>1</sup> |                               |
|----------|-----------------|--------------------------------------|-------------------------|-------------------------------|
|          | <sup>13</sup> C | <sup>1</sup> H, mult. (J, Hz)        | <sup>13</sup> C         | <sup>1</sup> H, mult. (J, Hz) |
| 1        | 39.9            | 1.69<br>0.78                         | 39.9                    |                               |
| 2        | 18.2            | 1.53<br>1.36                         | 18.2                    |                               |
| 3        | 42.1            | 1.37 td J=4.03, 13.45, 13.51<br>1.11 | 42.0                    |                               |
| 4        | 33.2            |                                      | 33.2                    |                               |
| 5        | 56.5            | 0.78                                 | 56.5                    |                               |
| 6        | 18.6            | 1.60<br>1.42                         | 18.6                    |                               |
| 7        | 41.9            | 1.73<br>0.91                         | 41.8                    |                               |
| 8        | 37.4            |                                      | 37.4                    |                               |
| 9        | 58.8            | 0.78                                 | 58.8                    |                               |
| 10       | 38.1            |                                      | 38.1                    |                               |
| 11       | 27.2            | 1.69<br>1.46                         | 27.2                    |                               |
| 12       | 80.6            | 3.45 dd J=3.99, 11.37                | 80.5                    | 3.44, dt, J =3.8.11.3         |
| 13       | 42.7            |                                      | 42.7                    |                               |
| 14       | 54.8            | 0.92                                 | 54.7                    |                               |
| 15       | 28.0            | 2.05<br>1.40                         | 28.0                    |                               |
| 16       | 69.4            | 5.36 dd J=6.06, 10.43                | 69.3                    | 5.38 (dd,J = 4,10Hz)          |
| 17       | 114.4           |                                      | 114.4                   |                               |
| 18       | 64.2            | 2.42                                 | 64.2                    | 2.42                          |
| 19       | 101.7           | 6.76 d J=1.38                        | 101.6                   | 6.77 (d, J= 1.3 Hz)           |
| 20       | 135.4           | 6.15 t J=1.93                        | 135.3                   | 6.17 (t, J = 2 Hz)            |
| 21       | 33.3            | 0.84                                 | 33.2                    | 0.87                          |
| 22       | 21.3            | 0.79                                 | 21.3                    | 0.77                          |
| 23       | 16.3            | 0.82                                 | 16.3                    | 0.79                          |
| 24       | 17.3            | 0.82                                 | 17.3                    | 0.81                          |
| 25       | 8.8             | 0.90                                 | 8.8                     | 0.81                          |
| OAc      | 21.4            | 2.09                                 | 21.2                    | 2.07                          |
| OAc      | 21.0            | 2.09                                 | 21.0                    | 2.07                          |
| CO       | 171.3           |                                      | 171.3                   |                               |
| CO       | 170.1           |                                      | 170.1                   |                               |

Table S2.  $^{13}\text{C}$  and  $^1\text{H}$  chemical shifts of bengamide P 2 isolated and that reported in literature.

| Position | Isolated        |                                  | Literature <sup>2</sup> |                                |
|----------|-----------------|----------------------------------|-------------------------|--------------------------------|
|          | $^{13}\text{C}$ | $^1\text{H}$ , mult. (J, Hz)     | $^{13}\text{C}$         | $^1\text{H}$ , mult. (J, Hz)   |
| 17       | 174.9           |                                  | 175.1                   |                                |
| 16       | 173.3           |                                  | 173.6                   |                                |
| 9        | 172.0           |                                  | 172.2                   |                                |
| 3        | 143.8           | 5.84 (1H, dd, J= 6.47, 15.42 Hz) | 144.1                   | 5.83 (1H, dd, J= 6.5, 16.0 Hz) |
| 4        | 121.8           | 5.40 (1H, dd, J= 7.84, 15.41 Hz) | 122.0                   | 5.39 (1H, dd, J= 7.5, 16.0 Hz) |
| 8        | 80.7            | 3.76 (1H, bs)                    | 80.8                    | 3.74 (1H, bs)                  |
| 5        | 75.7            | 5.47 (1H, t= 7.60 Hz)            | 75.9                    | 5.47 (1H, t= 7.5 Hz)           |
| 7        | 71.8            | 3.75 (1H, bs)                    | 72.0                    | 3.74 (1H, bs)                  |
| 6        | 71.2            | 3.75 (1H, bs)                    | 71.4                    | 3.74 (1H, bs)                  |
| 13       | 28.8            | 1.88 (1H, m)<br>1.43 (1H, m)     | 29.1                    | 1.86 (1H, m)<br>1.43 (1H, m)   |
| OMe      | 60.0            | 3.53 (3H, s)                     | 60.2                    | 3.53 (3H, s)                   |
| 10       | 52.0            | 4.55 (1H, m)                     | 52.2                    | 4.54 (1H, m)                   |
| 14       | 42.1            | 3.29 (2H, m)                     | 42.3                    | 3.29 (2H, m)                   |
| 18       | 34.6            | 2.34 (2H, t, J=7.32)             | 34.9                    | 2.34 (2H, t, J=7.5)            |
| 12       | 27.9            | 2.05 (1H, m)<br>1.84 (1H, m)     | 28.2                    | 2.07 (1H, m)<br>1.86 (1H, m)   |
| 28       | 31.9            | 1.27 (2H, m)                     | 32.1                    | 1.26 (2H, m)                   |
| 2        | 30.9            | 2.30 (1H, m)                     | 30.0                    | 2.34 (1H, m)                   |
| 20-27    | 30.8-29.1       | 1.27 (16H, m)                    | 30.0-29.3               | 1.26 (16H, m)                  |
| 11       | 31.1            | 2.09 (1H, m)<br>1.56 (1H, m)     | 31.4                    | 2.07 (1H, m)<br>1.60 (1H, m)   |
| 19       | 25.0            | 1.64 (2H, m)                     | 25.2                    | 1.60 (2H, m)                   |
| 29       | 22.8            | 1.28 (2H, m)                     | 22.9                    | 1.26 (2H, m)                   |
| 1,15     | 21.9, 22.0      | 0.99 (6H, d J=6.88 Hz)           | 22.1, 22.2              | 0.98 (6H, d J=7.0 Hz)          |
| 30       | 14.1            | 0.88 (3H, t J=7.08 Hz)           | 14.3                    | 0.89 (3H, t J=7.0 Hz)          |

Table S3.  $^{13}\text{C}$  and  $^1\text{H}$  chemical shifts of bengamide Q 3 isolated and that reported in literature.

| Position | Isolated        |                                                               | Literature <sup>3</sup> |                                                           |
|----------|-----------------|---------------------------------------------------------------|-------------------------|-----------------------------------------------------------|
|          | $^{13}\text{C}$ | $^1\text{H}$ , mult. (J, Hz)                                  | $^{13}\text{C}$         | $^1\text{H}$ , mult. (J, Hz)                              |
| 17       | 173.4           |                                                               | 173.6                   |                                                           |
| 16       | 172.2           |                                                               | 172.4                   |                                                           |
| 9        | 171.9           |                                                               | 172.1                   |                                                           |
| 3        | 143.8           | 5.82 (1H, dd, J=6.47, 15.42 Hz)                               | 144.0                   | 5.83 (1H, dd, J=6.5, 16.0 Hz)                             |
| 4        | 121.8           | 5.38 (1H, dd, J=7.92, 15.39 Hz)                               | 122.0                   | 5.39 (1H, dd, J=7.5, 16.0 Hz)                             |
| 8        | 80.4            | 3.74 (1H, bs)                                                 | 80.6                    | 3.74 (1H, bs)                                             |
| 5        | 75.7            | 5.45 (1H, t, J=7.64 Hz)                                       | 75.9                    | 5.46 (1H, t, J=7.5 Hz)                                    |
| 7        | 71.7            | 3.72 (1H, bs)                                                 | 71.9                    | 3.74 (1H, bs)                                             |
| 6        | 71.2            | 3.72 (1H, bs)                                                 | 71.4                    | 3.74 (1H, bs)                                             |
| 13       | 26.6            | 1.82 (1H, m)<br>1.42 (1H, m)                                  | 27.9                    | 1.84 (1H, m)<br>1.47 (1H, m)                              |
| OMe      | 60.1            | 3.50 (3H, s)                                                  | 60.3                    | 3.54 (3H, s)                                              |
| 10       | 51.6            | 4.61 (1H, m)                                                  | 50.6                    | 4.62 (1H, m)                                              |
| NMe      | 36.1            | 3.03 (3H, s)                                                  | 36.3                    | 3.05 (3H, s)                                              |
| 14       | 50.4            | 3.60 (1H, dd, J=15.50, 11.51)<br>3.21 (1H, dd, J=5.45, 15.53) | 52.1                    | 3.62 (1H, dd, J=15.5, 11.5)<br>3.22 (1H, dd, J=5.5, 15.5) |
| 18       | 34.7            | 2.32 (2H, m)                                                  | 34.9                    | 2.34 (2H, t, J=7.5)                                       |
| 12       | 27.7            | 1.97 (1H, m)<br>1.82 (1H, m)                                  | 26.8                    | 2.02 (1H, m)<br>1.84 (1H, m)                              |
| 28       | 31.9            | 1.25 (2H, m)                                                  | 32.1                    | 1.26 (2H, m)                                              |
| 2        | 30.8            | 2.28 (1H, m)                                                  | 31.0                    | 2.34 (1H, m)                                              |
| 20-27    | 29.7-29.2       | 1.26 (16H, m)                                                 | 29.9-29.3               | 1.26 (16H, m)                                             |
| 11       | 31.4            | 2.04 (1H, m)<br>1.49 (1H, m)                                  | 31.5                    | 2.02 (1H, m)<br>1.63 (1H, m)                              |
| 19       | 25.0            | 1.62 (2H, m)                                                  | 25.2                    | 1.63 (2H, m)                                              |
| 29       | 22.7            | 1.27 (2H, m)                                                  | 22.9                    | 1.26 (2H, m)                                              |
| 1,15     | 22.0, 21.9      | 0.97 (6H, d J=6.74 Hz)                                        | 22.2-22.1               | 0.98 (6H, d J=6.5 Hz)                                     |
| 30       | 14.3            | 0.87 (3H, t J=6.81 Hz)                                        | 14.3                    | 0.89 (3H, t J=6.5 Hz)                                     |

Table S4. Compounds isolated and tentatively identified in the molecular cluster of the crude extract (SS2) of the sponge *Jaspis splendens* with their corresponding masses (observed and calculated), molecular formulae (MF), and mass error (ID ( $\Delta$  ppm))

| Compound                                                 | m/z<br>([M+Na] <sup>+</sup> )<br>Observed | m/z<br>([M+Na] <sup>+</sup> )<br>Calculated | MF                                                            | ID<br>$\Delta$ ppm |
|----------------------------------------------------------|-------------------------------------------|---------------------------------------------|---------------------------------------------------------------|--------------------|
| Bengamide P                                              | 591.3978                                  | 591.3966                                    | C <sub>31</sub> H <sub>56</sub> N <sub>2</sub> O <sub>7</sub> | 2.03               |
| Bengamide Q                                              | 605.4133                                  | 605.4122                                    | C <sub>32</sub> H <sub>58</sub> N <sub>2</sub> O <sub>7</sub> | 1.82               |
| Bengamide A<br>Bengamide N<br>Bengamide H                | 607.3928                                  | 607.3915                                    | C <sub>31</sub> H <sub>56</sub> N <sub>2</sub> O <sub>8</sub> | 2.14               |
| Bengamide R                                              | 619.4286                                  | 619.4279                                    | C <sub>33</sub> H <sub>60</sub> N <sub>2</sub> O <sub>7</sub> | 1.13               |
| Bengamide B<br>Bengamide I<br>Bengamide L<br>Bengamide O | 621.4084                                  | 621.4071                                    | C <sub>32</sub> H <sub>59</sub> N <sub>2</sub> O <sub>8</sub> | 2.09               |
| Bengamide J<br>Bengamide M                               | 635.4233                                  | 635.4228                                    | C <sub>33</sub> H <sub>60</sub> N <sub>2</sub> O <sub>8</sub> | 0.78               |
| Bengamide S                                              | 633.4446                                  | 633.4455                                    | C <sub>34</sub> H <sub>62</sub> N <sub>2</sub> O <sub>7</sub> | -1.42              |

#### References

1. Kazlauskas, R., Murphy, P. T., Quinn, R. J., Wells, R. J. Heteronemin, a new Scalarin type Sesterterpene from the Sponge *Heteronema erecta*. *Tetrahedron Lett.* 1976, 2631–2634.
2. Bourguet-Kondracki, M. L., Martin, M. T., Debitus, C., Guyot, M. 12-epi-Heteroaemin : New Sesterterpene From Sponge the marine sponge *Hyrrios erecta*. *Tetrahedron Lett.* 1994, **35**, 109–110.
3. Thale, Z. *et al.* Bengamides Revisited : New Structures and Antitumor Studies. *J. Org. Chem.* 2001, 66, 1733–1741.
